# Supplementary material
Source: PubMed Central journal article supplement (PMC3255882)
Supplement: supp_86.1.11_TableS1.pdf [file supp_86.1.11_TableS1.pdf]

Table S1. Sample information.

| Strain                   | Sample Date | Pandemic wave | Passage isolate <sup>a</sup> | City                | Region        | Sequenced at | Sequencing platform | GenBank Accession numbers | Global Cluster | UK Cluster |
|--------------------------|-------------|---------------|------------------------------|---------------------|---------------|--------------|---------------------|---------------------------|----------------|------------|
| A/England/195/2009       | 27-Apr-2009 | First         | S1                           | London              | London        | Cfl          | Capillary           | GQ166654-GQ166661         | 3              | -          |
| A/England/197/2009       | 27-Apr-2009 | First         | M1                           | Birmingham          | West Midlands | Cfl          | Capillary           | CY065195-CY065202         | 2              | -          |
| A/England/200/2009       | 28-Apr-2009 | First         | S1                           | Bristol             | South West    | Cfl          | Capillary           | CY065227-CY065234         | 7              | -          |
| A/England/201/2009       | 02-May-2009 | First         | S1                           | Manchester          | North West    | Cfl          | Capillary           | CY065331-CY065338         | 1              | -          |
| A/England/202/2009       | 27-Apr-2009 | First         | S1                           | Bristol             | South West    | Cfl          | Capillary           | CY065187-CY065194         | 7              | -          |
| A/England/204/2009       | 28-Apr-2009 | First         | S1                           | London              | London        | Cfl          | Capillary           | CY065203-CY065210         | 5              | D          |
| A/England/205/2009       | 27-Apr-2009 | First         | S1                           | London              | London        | Cfl          | Capillary           | CY065211-CY065218         | 5              | -          |
| A/England/207/2009       | 27-Apr-2009 | First         | S1                           | Manchester          | North West    | Cfl          | Capillary           | CY065219-CY065226         | 7              | -          |
| A/England/211/2009       | 28-Apr-2009 | First         | S1                           | London              | London        | Cfl          | Capillary           | CY065251-CY065258         | 3              | A1         |
| A/England/214/2009       | 30-Apr-2009 | First         | S1                           | Birmingham          | West Midlands | Cfl          | Capillary           | CY065267-CY065274         | 7              | -          |
| A/England/215/2009       | 30-Apr-2009 | First         | S1                           | London              | London        | Cfl          | Capillary           | CY065275-CY065282         | 3              | A1         |
| A/England/216/2009       | 30-Apr-2009 | First         | S1                           | London              | London        | Cfl          | Capillary           | CY065283-CY065290         | 3              | A1         |
| A/England/218/2009       | 02-May-2009 | First         | S1                           | Birmingham          | West Midlands | Cfl          | Capillary           | CY065299-CY065306         | 3              | -          |
| A/England/219/2009       | 02-May-2009 | First         | S1                           | London              | London        | Cfl          | Capillary           | CY065315-CY065322         | 3              | A2         |
| A/England/220/2009       | 02-May-2009 | First         | S1                           | London              | London        | Cfl          | Capillary           | CY065323-CY065330         | 3              | A2         |
| A/England/223/2009       | 29-Apr-2009 | First         | S1                           | Cambridge           | East          | Cfl          | Capillary           | CY065339-CY065346         | 7              | -          |
| A/England/246/2009       | 02-May-2009 | First         | S1                           | London              | London        | Cfl          | Capillary           | CY065307-CY065314         | 3              | -          |
| A/England/247/2009       | 03-May-2009 | First         |                              | Cambridge           | East          | Cfl          | Capillary           | CY065347-CY065354         | 2              | -          |
| A/England/252/2009       | 08-May-2009 | First         | S1                           | London              | London        | Cfl          | Capillary           | CY065387-CY065394         | 3              | A2         |
| A/England/253/2009       | 07-May-2009 | First         | S1                           | London              | London        | Cfl          | Capillary           | CY065403-CY065410         | 3              | A2         |
| A/England/254/2009       | 05-May-2009 | First         |                              | London              | London        | Cfl          | Capillary           | CY065411-CY065418         | 3              | A2         |
| A/England/256/2009       | 08-May-2009 | First         |                              | Cambridge           | East          | Cfl          | Capillary           | CY065427-CY065434         | 2              | B          |
| A/England/257/2009       | 09-May-2009 | First         |                              | London              | London        | Cfl          | Capillary           | CY065435-CY065442         | 3              | A2         |
| A/England/259/2009       | 11-May-2009 | First         |                              | London              | London        | Cfl          | Capillary           | CY065443-CY065450         | 7              | F          |
| A/England/263/2009       | 12-May-2009 | First         |                              | London              | London        | Cfl          | Capillary           | CY065475-CY065482         | 7              | F          |
| A/England/264/2009       | 12-May-2009 | First         |                              | Southampton         | South East    | Cfl          | Capillary           | CY065483-CY065490         | 7              | F          |
| A/England/265/2009       | 12-May-2009 | First         |                              | Southampton         | South East    | Cfl          | Capillary           | CY065491-CY065498         | 7              | F          |
| A/England/266/2009       | 15-May-2009 | First         |                              | London              | London        | Cfl          | Capillary           | CY065515-CY065522         | 3              | A2         |
| A/England/359/2009       | 31-May-2009 | First         | S1                           | London              | London        | Cfl          | Capillary           | CY065531-CY065538         | 2              | C          |
| A/England/361/2009       | 01-Jun-2009 | First         | S2                           | Cambridge           | East          | Cfl          | Capillary           | CY065539-CY065546         | 2              | C          |
| A/England/381/2009       | 01-Jun-2009 | First         | S1                           | Southampton         | South East    | Cfl          | Capillary           | CY065547-CY065554         | 2              | C          |
| A/England/382/2009       | 01-Jun-2009 | First         | S1                           | Southampton         | South East    | Cfl          | Capillary           | CY065555-CY065562         | 2              | C          |
| A/England/384/2009       | 01-Jun-2009 | First         | S1                           | Southampton         | South East    | Cfl          | Capillary           | CY065563-CY065570         | 2              | C          |
| A/England/385/2009       | 01-Jun-2009 | First         | S1                           | Southampton         | South East    | Cfl          | Capillary           | CY065571-CY065578         | 7              | -          |
| A/England/386/2009       | 01-Jun-2009 | First         | S1                           | Southampton         | South East    | Cfl          | Capillary           | CY065579-CY065586         | 2              | C          |
| A/England/388/2009       | 02-Jun-2009 | First         | S1                           | Southampton         | South East    | Cfl          | Capillary           | CY065587-CY065594         | 3              | -          |
| A/England/389/2009       | 03-Jun-2009 | First         | S1                           | London              | London        | Cfl          | Capillary           | CY065595-CY065602         | 7              | -          |
| A/England/392/2009       | 03-Jun-2009 | First         | S1                           | London              | London        | Cfl          | Capillary           | CY065603-CY065610         | 7              | -          |
| A/England/394/2009       | 02-Jun-2009 | First         | M1                           | Southampton         | South East    | Cfl          | Capillary           | CY065611-CY065618         | 2              | C          |
| A/England/395/2009       | 01-Jun-2009 | First         | S1                           | Southampton         | South East    | Cfl          | Capillary           | CY065619-CY065626         | 2              | C          |
| A/England/398/2009       | 03-Jun-2009 | First         | S1                           | London              | London        | Cfl          | Capillary           | CY065627-CY065634         | 7              | -          |
| A/England/400/2009       | 05-Jun-2009 | First         | S1                           | Leicester           | East Midlands | Cfl          | Capillary           | CY065635-CY065642         | 2              | C          |
| A/England/402/2009       | 01-Jun-2009 | First         | S1                           | London              | London        | Cfl          | Capillary           | CY065643-CY065650         | 7              | -          |
| A/England/411/2009       | 04-Jun-2009 | First         | S1                           | London              | London        | Cfl          | Capillary           | CY065651-CY065658         | 7              | L          |
| A/England/414/2009       | 04-Jun-2009 | First         | S1                           | London              | London        | Cfl          | Capillary           | CY065659-CY065666         | 3              | -          |
| A/England/418/2009       | 05-Jun-2009 | First         | S1                           | London              | London        | Cfl          | Capillary           | CY065667-CY065674         | 7              | -          |
| A/England/419/2009       | 05-Jun-2009 | First         | S1                           | London              | London        | Cfl          | Capillary           | CY065675-CY065682         | 7              | -          |
| A/England/423/2009       | 04-Jun-2009 | First         | S1                           | Southampton         | South East    | Cfl          | Capillary           | CY065683-CY065690         | 2              | C          |
| A/England/428/2009       | 04-Jun-2009 | First         | S1                           | Southampton         | South East    | Cfl          | Capillary           | CY065691-CY065698         | 2              | C          |
| A/England/430/2009       | 05-Jun-2009 | First         | S1                           | Birmingham          | West Midlands | Cfl          | Capillary           | CY065699-CY065706         | 7              | L          |
| A/England/431/2009       | 05-Jun-2009 | First         | S1                           | Southampton         | South East    | Cfl          | Capillary           | CY065707-CY065714         | 3              | -          |
| A/England/433/2009       | 05-Jun-2009 | First         | S1                           | Southampton         | South East    | Cfl          | Capillary           | CY065715-CY065722         | 2              | C          |
| A/England/434/2009       | 06-Jun-2009 | First         | S1                           | Southampton         | South East    | Cfl          | Capillary           | CY065723-CY065730         | 7              | -          |
| A/England/445/2009       | 09-Jun-2009 | First         | S1                           | Cambridge           | East          | Cfl          | Capillary           | CY065731-CY065738         | 2              | C          |
| A/England/541/2009       | 23-Jun-2009 | First         | S1                           | Newcastle-Upon-Tyne | North East    | Cfl          | Capillary           | CY065155-CY065162         | 7              | K          |
| A/England/551/2009       | 27-Apr-2009 | First         | S1                           | Bristol             | South West    | Cfl          | Capillary           | CY065235-CY065242         | 7              | -          |
| A/Scotland/91800799/2009 | 24-Apr-2009 | First         |                              | Glasgow             | Scotland      | Cfl          | Capillary           | CY065147-CY065154         | 7              | -          |
| A/England/92860032/2009  | 06-Jul-2009 | First         |                              | London              | London        | Cfl          | Capillary           | CY065163-CY065170         | 7              | -          |
| A/England/634/2009       | 01-Jul-2009 | First         |                              | Lambeth             | London        | Cfl          | Capillary           | CY065171-CY065178         | 7              | -          |
| A/England/675/2009       | 10-Jul-2009 | First         |                              | London              | London        | Cfl          | Capillary           | CY065179-CY065186         | 7              | -          |
| A/England/XFL00071/2009  | 27-Apr-2009 | First         |                              | Southampton         | South East    | Cfl          | Capillary           | CY065243-CY065250         | 5              | -          |
| A/England/XFL00137/2009  | 29-Apr-2009 | First         |                              | London              | London        | Cfl          | Capillary           | CY065259-CY065266         | 5              | D          |
| A/England/XFL00200/2009  | 04-May-2009 | First         |                              | London              | London        | Cfl          | Capillary           | CY065355-CY065362         | 3              | A2         |
| A/England/XFL00275/2009  | 05-May-2009 | First         |                              | London              | London        | Cfl          | Capillary           | CY065363-CY065370         | 3              | A2         |
| A/England/XFL00300/2009  | 07-May-2009 | First         |                              | London              | London        | Cfl          | Capillary           | CY065371-CY065378         | 3              | A2         |
| A/England/XFL00304/2009  | 05-May-2009 | First         |                              | London              | London        | Cfl          | Capillary           | CY065379-CY065386         | 3              | A2         |
| A/England/XFL00311/2009  | 07-May-2009 | First         |                              | Cambridge           | East          | Cfl          | Capillary           | CY065395-CY065402         | 2              | B          |
| A/England/XFL00354/2009  | 10-May-2009 | First         |                              | Cambridge           | East          | Cfl          | Capillary           | CY065419-CY065426         | -              | -          |
| A/England/XFL00418/2009  | 11-May-2009 | First         |                              | London              | London        | Cfl          | Capillary           | CY065451-CY065458         | 7              | F          |
| A/England/XFL00419/2009  | 12-May-2009 | First         |                              | London              | London        | Cfl          | Capillary           | CY065459-CY065466         | 3              | A2         |
| A/England/XFL00473/2009  | 12-May-2009 | First         |                              | London              | London        | Cfl          | Capillary           | CY065467-CY065474         | 7              | F          |
| A/England/XFL00481/2009  | 13-May-2009 | First         |                              | London              | London        | Cfl          | Capillary           | CY065499-CY065506         | 7              | F          |
| A/England/XFL00482/2009  | 13-May-2009 | First         |                              | London              | London        | Cfl          | Capillary           | CY065507-CY065514         | 7              | -          |
| A/England/XFL00532/2009  | 15-May-2009 | First         |                              | London              | London        | Cfl          | Capillary           | CY065523-CY065530         | 7              | F          |
| A/Scotland/10/2009       | 11-Jun-2009 | First         | S1                           | Glasgow             | Scotland      | Cfl          | Capillary           | CY065739-CY065746         | 7              | -          |
| A/Scotland/4/2009        | 03-May-2009 | First         |                              | Glasgow             | Scotland      | Cfl          | Capillary           | CY065291-CY065298         | 3              | -          |
| A/England/456/2009       | 05-Jun-2009 | First         | S1                           | Berkshire           | South East    | WTSI         | Capillary           | HM567541-HM567548         | 2              | C          |
| A/England/213/2009       | 29-Apr-2009 | First         | S1                           | London              | London        | WTSI         | Capillary           | HM567549-HM567556         | 5              | D          |
| A/England/217/2009       | 30-Apr-2009 | First         | M1                           | Southampton         | South East    | WTSI         | Capillary           | HM567557-HM567564         | 2              | B          |
| A/England/221/2009       | 02-May-2009 | First         | M1                           | London              | London        | WTSI         | Capillary           | HM567565-HM567572         | 3              | A2         |
| A/England/249/2009       | 05-May-2009 | First         | S1                           | London              | London        | WTSI         | Capillary           | HM567573-HM567580         | 3              | A2         |
| A/England/303/2009       | 26-May-2009 | First         | S1                           | Birmingham          | West Midlands | WTSI         | Capillary           | HM567581-HM567588         | 7              | L          |

|                           |             |        |    |                      |                          |      |           |                   |   |   |
|---------------------------|-------------|--------|----|----------------------|--------------------------|------|-----------|-------------------|---|---|
| A/Ireland/1/2009          | 24-May-2009 | First  | S1 | Dublin               | Ireland                  | WTSI | Capillary | HM567589-HM567596 | 7 | - |
| A/England/313/2009        | 26-May-2009 | First  | S1 | London               | London                   | WTSI | Capillary | HM567597-HM567604 | 6 | E |
| A/England/328/2009        | 28-May-2009 | First  | S1 | Southampton          | South East               | WTSI | Capillary | HM567605-HM567612 | 2 | C |
| A/England/337/2009        | 30-May-2009 | First  | S1 | London               | London                   | WTSI | Capillary | HM567613-HM567620 | 2 | C |
| A/England/341/2009        | 30-May-2009 | First  | S1 | London               | London                   | WTSI | Capillary | HM567621-HM567628 | 7 | - |
| A/England/342/2009        | 29-May-2009 | First  | S1 | London               | London                   | WTSI | Capillary | HM567629-HM567636 | 2 | C |
| A/England/343/2009        | 30-May-2009 | First  | S1 | London               | London                   | WTSI | Capillary | HM567637-HM567644 | 7 | L |
| A/England/345/2009        | 30-May-2009 | First  | S1 | Southampton          | South East               | WTSI | Capillary | HM567645-HM567652 | 2 | C |
| A/England/346/2009        | 30-May-2009 | First  | S2 | Southampton          | South East               | WTSI | Capillary | HM567653-HM567660 | 7 | - |
| A/England/347/2009        | 30-May-2009 | First  | S1 | Southampton          | South East               | WTSI | Capillary | HM567661-HM567668 | 2 | C |
| A/England/348/2009        | 30-May-2009 | First  | S1 | Southampton          | South East               | WTSI | Capillary | HM567669-HM567676 | 2 | C |
| A/England/349/2009        | 30-May-2009 | First  | S1 | Southampton          | South East               | WTSI | Capillary | HM567677-HM567684 | 2 | C |
| A/England/350/2009        | 27-May-2009 | First  | S1 | Southampton          | South East               | WTSI | Capillary | HM567685-HM567692 | 2 | - |
| A/England/351/2009        | 31-May-2009 | First  | S1 | Manchester           | North West               | WTSI | Capillary | HM567693-HM567700 | 6 | - |
| A/England/360/2009        | 01-Jun-2009 | First  | S2 | Berkshire            | South East               | WTSI | Capillary | HM567701-HM567708 | 2 | C |
| A/Scotland/8/2009         | 31-May-2009 | First  | S1 | Edinburgh            | Scotland                 | WTSI | Capillary | HM567709-HM567716 | 7 | - |
| A/England/364/2009        | 31-May-2009 | First  | S1 | Southampton          | South East               | WTSI | Capillary | HM567717-HM567724 | 2 | C |
| A/England/365/2009        | 31-May-2009 | First  | S1 | Southampton          | South East               | WTSI | Capillary | HM567725-HM567732 | 2 | - |
| A/England/366/2009        | 31-May-2009 | First  | S2 | Birmingham           | West Midlands            | WTSI | Capillary | HM567733-HM567740 | 7 | I |
| A/England/374/2009        | 01-Jun-2009 | First  | S1 | Leeds                | Yorkshire and the Humber | WTSI | Capillary | HM567741-HM567748 | 2 | C |
| A/England/377/2009        | 02-Jun-2009 | First  | S1 | London               | London                   | WTSI | Capillary | HM567749-HM567756 | 2 | C |
| A/England/380/2009        | 02-Jun-2009 | First  | S1 | Manchester           | North West               | WTSI | Capillary | HM567757-HM567764 | 7 | - |
| A/England/383/2009        | 01-Jun-2009 | First  | S1 | Southampton          | South East               | WTSI | Capillary | HM567765-HM567772 | 2 | C |
| A/England/391/2009        | 02-Jun-2009 | First  | S1 | London               | London                   | WTSI | Capillary | HM567773-HM567780 | 6 | - |
| A/England/393/2009        | 02-Jun-2009 | First  | S1 | London               | London                   | WTSI | Capillary | HM567781-HM567788 | 7 | - |
| A/England/399/2009        | 03-Jun-2009 | First  | S1 | London               | London                   | WTSI | Capillary | HM567789-HM567796 | 2 | C |
| A/England/401/2009        | 03-Jun-2009 | First  | S1 | Newcastle-Upon-Tyne  | North East               | WTSI | Capillary | HM567797-HM567804 | 2 | - |
| A/Ireland/2/2009          | 26-May-2009 | First  | S1 | Dublin               | Ireland                  | WTSI | Capillary | HM567805-HM567812 | 7 | - |
| A/Ireland/7/2009          | 01-Jun-2009 | First  | S1 | Dublin               | Ireland                  | WTSI | Capillary | HM567813-HM567820 | 7 | I |
| A/Ireland/10/2009         | 05-Jun-2009 | First  | S1 | Dublin               | Ireland                  | WTSI | Capillary | HM567821-HM567828 | 7 | I |
| A/Ireland/3/2009          | 26-May-2009 | First  | S1 | Dublin               | Ireland                  | WTSI | Capillary | HM567829-HM567836 | 7 | - |
| A/Ireland/4/2009          | 29-May-2009 | First  | S1 | Dublin               | Ireland                  | WTSI | Capillary | HM567837-HM567844 | 7 | - |
| A/Ireland/5/2009          | 31-May-2009 | First  | S1 | Dublin               | Ireland                  | WTSI | Capillary | HM567845-HM567852 | 6 | - |
| A/England/415/2009        | 04-Jun-2009 | First  | S1 | Leicester            | East Midlands            | WTSI | Capillary | HM567853-HM567860 | 7 | - |
| A/England/416/2009        | 02-Jun-2009 | First  | S1 | Leicester            | East Midlands            | WTSI | Capillary | HM567861-HM567868 | 7 | J |
| A/England/421/2009        | 06-Jun-2009 | First  | S1 | London               | London                   | WTSI | Capillary | HM567869-HM567876 | 7 | - |
| A/England/424/2009        | 04-Jun-2009 | First  | S1 | Southampton          | South East               | WTSI | Capillary | HM567877-HM567884 | 7 | H |
| A/England/429/2009        | 08-Jun-2009 | First  | S2 | Birmingham           | West Midlands            | WTSI | Capillary | HM567885-HM567892 | 7 | H |
| A/England/432/2009        | 05-Jun-2009 | First  | S2 | Southampton          | South East               | WTSI | Capillary | HM567893-HM567900 | 6 | E |
| A/England/435/2009        | 06-Jun-2009 | First  | S1 | Southampton          | South East               | WTSI | Capillary | HM567901-HM567908 | 7 | H |
| A/England/436/2009        | 05-Jun-2009 | First  | S2 | Southampton          | South East               | WTSI | Capillary | HM567909-HM567916 | 6 | E |
| A/England/443/2009        | 05-Jun-2009 | First  | S1 | Leicester            | East Midlands            | WTSI | Capillary | HM567917-HM567924 | 6 | E |
| A/England/446/2009        | 09-Jun-2009 | First  | S1 | Cambridge            | East                     | WTSI | Capillary | HM567949-HM567956 | 7 | J |
| A/England/450/2009        | 07-Jun-2009 | First  | S2 | Birmingham           | West Midlands            | WTSI | Capillary | HM567933-HM567940 | 7 | J |
| A/England/451/2009        | 07-Jun-2009 | First  | S2 | Birmingham           | West Midlands            | WTSI | Capillary | HM567941-HM567948 | 7 | J |
| A/England/857/2009        | 25-Nov-2009 | Second |    | Stamford             | East Midlands            | WTSI | Capillary | HM567949-HM567956 | 7 | K |
| A/England/865/2009        | 23-Nov-2009 | Second |    | Bristol              | South West               | WTSI | Capillary | HM567957-HM567964 | 7 | - |
| A/England/876/2009        | 20-Nov-2009 | Second |    | London               | London                   | WTSI | Capillary | HM567965-HM567972 | 7 | G |
| A/England/1111/2009       | 21-Oct-2009 | Second |    | Windsor              | South East               | WTSI | Capillary | HM567973-HM567980 | 7 | - |
| A/England/869/2009        | 18-Nov-2009 | Second |    | Wantage              | South East               | WTSI | illumina  | HM567981-HM567988 | 7 | - |
| A/England/859/2009        | 25-Nov-2009 | Second |    | Stamford             | East Midlands            | WTSI | illumina  | HM567989-HM567996 | 7 | - |
| A/England/900/2009        | 24-Nov-2009 | Second |    | Steyning             | South East               | WTSI | illumina  | HM567997-HM568004 | 7 | G |
| A/England/854/2009        | 23-Nov-2009 | Second |    | Gloucester           | South West               | WTSI | illumina  | HM568005-HM568012 | 7 | G |
| A/England/872/2009        | 20-Nov-2009 | Second |    | Peterborough         | East                     | WTSI | illumina  | HM568013-HM568020 | 7 | L |
| A/England/862/2009        | 23-Nov-2009 | Second |    | London               | London                   | WTSI | illumina  | HM568021-HM568028 | 7 | G |
| A/England/902/2009        | 20-Nov-2009 | Second |    | Nottingham           | East Midlands            | WTSI | illumina  | HM568029-HM568036 | 7 | L |
| A/England/898/2009        | 25-Nov-2009 | Second |    | Peterborough         | East                     | WTSI | illumina  | HM568037-HM568044 | 7 | L |
| A/England/950/2009        | 20-Oct-2009 | Second |    | Aldershot            | South East               | WTSI | illumina  | HM568045-HM568052 | 7 | - |
| A/England/1116/2009       | 21-Oct-2009 | Second |    | Windsor              | South East               | WTSI | illumina  | HM568053-HM568060 | 7 | G |
| A/England/H094240645/2009 | 12-Oct-2009 | Second |    | Birmingham           | West Midlands            | WTSI | illumina  | HM568061-HM568068 | 7 | K |
| A/England/H094220579/2009 | 12-Oct-2009 | Second |    | Huntingdon           | East                     | WTSI | illumina  | HM568069-HM568076 | 7 | L |
| A/England/1213/2009       | 28-Oct-2009 | Second |    | Scunthorpe           | Yorkshire and the Humber | WTSI | illumina  | HM568077-HM568084 | 7 | L |
| A/England/H094380096/2009 | 21-Oct-2009 | Second |    | Newcastle-Under-Lyme | West Midlands            | WTSI | illumina  | HM568085-HM568092 | 7 | K |
| A/England/766/2009        | 21-Oct-2009 | Second |    | Aylesbury            | South East               | WTSI | illumina  | HM568093-HM568100 | 7 | - |
| A/England/797/2009        | 26-Oct-2009 | Second |    | Liverpool            | North West               | WTSI | illumina  | HM568101-HM568108 | 7 | - |
| A/England/798/2009        | 22-Oct-2009 | Second |    | Liverpool            | North West               | WTSI | illumina  | HM568109-HM568116 | 7 | K |
| A/England/941/2009        | 02-Dec-2009 | Second |    | London               | London                   | WTSI | illumina  | HM568117-HM568124 | 7 | - |
| A/England/938/2009        | 30-Dec-2009 | Second |    | Bristol              | South West               | WTSI | illumina  | HM568125-HM568132 | 7 | - |
| A/England/H093780041/2009 | 09-Sep-2009 | Second |    | Workington           | North West               | WTSI | illumina  | HM568133-HM568140 | 7 | - |
| A/England/H093780034/2009 | 10-Sep-2009 | Second |    | Peterborough         | East                     | WTSI | illumina  | HM568141-HM568148 | 7 | L |
| A/England/H093900113/2009 | 18-Sep-2009 | Second |    | Nottingham           | East Midlands            | WTSI | illumina  | HM568149-HM568156 | 7 | - |

<sup>a</sup> Letter indicates cell type in which virus was passaged (M = MDCK, S = SIAT), number indicates number of passages; isolates without passage information were RT-PCR amplified from clinical material
