# Supplementary material
Source: PubMed Central journal article supplement (PMC3255882)
Supplement: supp_86.1.11_TableS2.pdf [file supp_86.1.11_TableS2.pdf]

1 Table S2. Cfl PCR and sequencing primers.

| Amplicon | Forward primer name <sup>a</sup> | Sequence (5'→3')           | Reverse primer name <sup>a</sup> | Sequence (5'→3')            |
|----------|----------------------------------|----------------------------|----------------------------------|-----------------------------|
| PB2-1    | <b>H5PB2F1</b>                   | AGCAAAAGCAGGTCAATTATATCA   | <b>cswPB2R1239</b>               | GAATACCATGGCCACAATTATTGC    |
|          | cswPB2F30                        | GGAGAGAATAAAAGAACTGAGAG    | cswPB2R475                       | GGGTTTGATCAACTCTCCTCC       |
|          | cswPB2F452                       | GGAGGAGAGTTGATACAAACCC     | cswPB2R853                       | GGCTGCTGACACTGCTGCTTTC      |
| PB2-2    | <b>cswPB2F830</b>                | GAAGAGCAGCAGTGTGACGACACC   | <b>H5PB2R2341</b>                | AGTAGAAAACAGGTCTTTTAAAC     |
|          | cswPB2F1215                      | GCAATAATTGTGGCCATGGTATTC   | cswPB2R1648                      | CATTGATCTCCACATCATTGATG     |
|          | cswPB2F1625                      | CATCAATGATGTGGAGATCAATG    | cswPB2R1952                      | CCTCTCACATTCACAGTCAATGAGG   |
| PB1-1    | cswPB2F1928                      | CCTCATTGACTGTGAATGTGAGAGG  | cswPB2R2298                      | GGCCATCCGAATCTTTTGGTCCG     |
|          | <b>H5PB1F1</b>                   | AGCAAAAGCAGGCAAAACATTTG    | <b>cswPB1R1225</b>               | CTGTGCCATCTATTAGAAAGAGGCC   |
|          | cswPB1F27                        | GGATGTCAATCCGACTCTACTTTTCC | cswPB1R449                       | GCAGTTGCTGCCGGTTGATTTCTG    |
| PB1-2    | cswPB1F426                       | CAGAAATCAACCGGACCACTGC     | cswPB1R844                       | CTACTGGGAGCCAGACTGTTCAGG    |
|          | <b>cswPB1F819</b>                | CTTGAAACAGTCTGGGCTCCAGTAG  | <b>H5PB1R2341</b>                | TGTAGAAAACAGGCATTTTTTCATG   |
|          | cswPB1F1202                      | GGCCTCTTCAATAGATGGCACAG    | cswPB1R1655                      | GCCTTTCAGAGTCCAAAGTCTATG    |
| PA-1     | cswPB1F1632                      | CAATGACCTTGGACCTGCAACGGC   | cswPB1R1970                      | TGGGCTGGCATTACCACAGCATTG    |
|          | cswPB1F1947                      | CAATGCTGTGGTAATGCCAGCCCA   | cswPB1R2290                      | GCCTGCTGAGTTCTTCAATGGTGG    |
|          | <b>H5PAF1</b>                    | AGCAAAAGCAGGTACTGATCCAA    | <b>cswPAR1286</b>                | CTTGAAATCAGTCAATTCACATGCC   |
| PA-2     | cswPAF26                         | GGAAAGACTTTGTGCGACAATGCTTC | cswPAR429                        | GGCTTTCTCTAGTAATATATGTTG    |
|          | cswPAF405                        | CCACATATATTAAGTAGAGAAAGCC  | cswPAR884                        | GCAGGAACTTTGACCGCTGATGGC    |
|          | <b>CswPAF861</b>                 | GCCATCAGCGGTCAAAGTTCCTCG   | <b>H5PAR2233</b>                 | AGTAGAAAACAGGTACTTTTTGGGA   |
| HA-1     | CswPAF1262                       | GGCATGTGAATTGACTGATTCAAG   | cswPAR1635                       | CCATTTGTGTGGCTCCAGTCTCGG    |
|          | cswPAF1612                       | CCGAGACTGGAGCCACACAATGG    | cswPAR1926                       | CCCAATAGAGCCTTCTCCACTCC     |
|          | cswPAF1903                       | GGAGTGGAGGAAAGGCTCTATTGGG  | cswPAR2175                       | CTACTTCAAGTGCATGTGTGAGGAAAG |
| HA-2     | <b>cswHAF1</b>                   | AGCAAAAGCAGGGAAAATAAAAGC   | <b>cswHAR1264</b>                | CCTACTGCTGTGAACGTGTATTTC    |
|          | cswHAF31                         | ATGAAGGCAATACTAGTAGTTCTGCG | cswHAR475                        | CCTTTGTCGAGTGCATGTTGGGC     |
|          | cswHAF451                        | GCCCAATCATGACTCGAACAAAGG   | cswHAR873                        | CAGATCCAGCATTTCTTCCATTGC    |
| NP       | <b>cswHAF848</b>                 | GCAATGGAAGAAATGCTGGATCTG   | <b>cswHAR1777</b>                | GTAGAAAACAAAGGGTTTTTTCTC    |
|          | cswHAF1240                       | GAATACACAGTTCACAGCAGTAGG   | cswHAR1726                       | ACATATTCTACACTGTAGAGACCC    |
|          | <b>H1NPF1</b>                    | AGCAAAAGCAGGGTAGATAATCAC   | <b>cswNPR1202</b>                | CAGTATCTGCTTCTCAGTCCAGG     |
| NA       | cswNPF46                         | ATGGCGTCTCAAGGCACCAACCG    | H1NPR1                           | AGTAGAAAACAGGGTATTTTCTCT    |
|          | cswNPF326                        | ACCCATATATAGAAGTAGACGG     | cswNPR350                        | CCGTCTACTTCTATATATGGGT      |
|          | cswNPF747                        | CCAGAGGGCAATGATGATCAAGT    | cswNPR760                        | ACTTGATCCATCATTGCCCTCTGG    |
| MP       | cswNPF1179                       | CCTGGAAGTGAAGCAGACTACTG    | cswNPR1528                       | CTGTACTACTCTCTGCATTGTCTC    |
|          | <b>cswN1F1</b>                   | AGCAAAAGCAGGAGTTTAAATG     | <b>cswN1R1440</b>                | TAGTAGAAAACAGGAGTTTTTTGA    |
|          | cswN1F401                        | GGAATGCAGAACCTTCTTCTTGAC   | cswN1R424                        | GTCAAGAAGAAGGTTCTGCATCC     |
| NS       | cswN1F1076                       | ATACGGCAATGGTGTGGATAGG     | cswN1R1099                       | CCTATCCAAACACCATTGCCGTAT    |
|          | <b>MF1</b>                       | AGCAAAAGCAGGTAGATATTGAAAGA | <b>MR1027</b>                    | AGTAGAAAACAGGTAGTTTTTACTC   |
|          | cswMF26                          | ATGAGTCTTCTAACCAGGTCGAA    | cswMR579                         | GTAGTGTAGCCAGCACCATTCTG     |
| NS       | cswMF555                         | CAGAATGTGTGCTGGCTAGCACTAC  | cswMR1002                        | CTAGCTCTATGTGACAAAATGACC    |
|          | <b>H3NSF1</b>                    | AGCAAAAGCAGGGTGACAAAGACA   | <b>cswNSR890</b>                 | AGTAGAAAACAGGGTGTTTTTTAT    |
|          | cswNSF26                         | ATGGACTCCAACACCATGTCAAGC   | cswNSR502                        | AGTAGTATCAAGGTCTCTAATCGG    |
|          | cswNSF478                        | CCGATAGACACCTTGATACTACT    | cswNSR864                        | AAATAAGCTGAAACGAGAAAGCTC    |

<sup>a</sup> Primers shown in bold were used for both PCR and sequencing, all other primers were used for sequencing only
