# Supplementary material
Source: PubMed Central journal article supplement (PMC3255882)
Supplement: supp_86.1.11_TableS3.pdf [file supp_86.1.11_TableS3.pdf]

Table S3. WTS1 primer sequences and combinations.

Table with 10 columns: Amplicon, Forward primer name, Forward primer position, Forward primer sequence (5'--3'), Reverse primer name, Reverse primer position, Reverse primer sequence (5'--3'), and Amplicon size (bp). The table lists primer sequences for various amplicons including PB2-1 to PB2-12, PB1-1 to PB1-12, PA-1 to PA-12, HA-1 to HA-10, NP-1 to NP-10, NA-1 to NA-10, MP-1 to MP-10, NS-1 to NS-10.
