# Supplementary material
Source: PubMed Central journal article supplement (PMC3255882)
Supplement: supp_86.1.11_TableS4.pdf [file supp_86.1.11_TableS4.pdf]

1 Table S4. Coding changes. UK cluster-specific coding changes.

| Gene | Position <sup>a</sup> | Global <sup>b</sup>         | Cluster <sup>c</sup> |           |            |        |        |        |        |        |        |        |           |         | Potential functional significance |  |
|------|-----------------------|-----------------------------|----------------------|-----------|------------|--------|--------|--------|--------|--------|--------|--------|-----------|---------|-----------------------------------|--|
|      |                       |                             | A<br>25              | B<br>3    | C<br>27    | D<br>3 | E<br>4 | F<br>8 | G<br>5 | H<br>3 | I<br>3 | J<br>4 | K<br>5    | L<br>12 |                                   |  |
| PB2  | 191                   | E(587),K(8)                 |                      |           |            |        |        |        |        |        |        |        |           |         | K(8),E(4)                         |  |
| PB2  | 267                   | V(591),I(4)                 |                      | I(3)      |            |        |        |        |        |        |        |        |           |         |                                   |  |
| PB2  | 495                   | V(590),A(4),I(1)            |                      |           |            |        |        |        |        |        |        | A(4)   |           |         |                                   |  |
| PB2  | 526                   | K(555),R(40)                |                      |           | R(27)      |        |        |        |        |        |        |        |           |         |                                   |  |
| PB1  | 353                   | K(541),R(52),X(2)           | R(24),X(1)           |           |            |        |        |        |        |        |        |        |           |         |                                   |  |
| PB1  | 435                   | I(575),V(18),X(2)           |                      |           |            | V(3)   |        |        |        |        |        |        |           |         |                                   |  |
| PB1  | 587                   | V(557),A(32),G(6)           |                      |           | A(27)      |        |        |        |        |        |        |        |           |         |                                   |  |
| PB1  | 736                   | K(566),G(27),X(1),R(1)      |                      |           |            |        |        | G(5)   |        |        |        |        |           |         |                                   |  |
| PA   | 3                     | D(567),G(24),-(4)           | G(23),-(2)           |           |            |        |        |        |        |        |        |        |           |         |                                   |  |
| PA   | 14                    | V(557),I(38)                |                      |           |            |        |        |        | I(5)   |        |        |        |           |         |                                   |  |
| PA   | 208                   | T(592),A(3)                 |                      |           |            |        |        |        |        | A(3)   |        |        |           |         |                                   |  |
| PA   | 259                   | P(591),S(4)                 |                      |           |            | S(3)   |        |        |        |        |        |        |           |         |                                   |  |
| PA   | 351                   | E(591),G(3),X(1)            |                      |           |            |        |        |        |        |        | G(3)   |        |           |         |                                   |  |
| PA   | 581                   | M(525),L(70)                |                      | L(3)      | L(27)      |        |        |        |        |        |        |        |           |         |                                   |  |
| PA   | 602                   | V(591),I(4)                 |                      |           |            |        |        |        |        |        |        | I(4)   |           |         |                                   |  |
| PA   | 716                   | K(560),Q(29),-(6)           |                      |           |            |        |        |        | Q(5)   |        |        |        |           |         |                                   |  |
| HA   | 2                     | K(569),E(22),-(3),X(1)      |                      |           |            |        | E(4)   |        |        |        |        |        |           |         |                                   |  |
| HA   | 49(32)                | L(538),I(57)                | I(25)                |           |            |        |        |        |        |        |        |        |           |         |                                   |  |
| HA   | 178(161)              | L(591),F(3),I(1)            |                      |           |            |        |        |        |        | F(3)   |        |        |           |         | Within antigenic site Sa (1)      |  |
| HA   | 179(162)              | S(587),N(8)                 |                      |           | N(3)       |        |        |        |        |        |        |        |           |         | Within antigenic site Sa (1)      |  |
| HA   | 202(185)              | S(589),N(3),I(3)            |                      |           |            |        |        |        |        | I(3)   |        |        |           |         |                                   |  |
| HA   | 220(203)              | T(354),S(235),X(5),A(1)     | S(25)                | S(3)      | S(27)      | S(3)   | S(4)   |        |        |        |        |        |           |         |                                   |  |
| HA   | 239(222)              | D(561),E(16),G(9),X(6),N(3) |                      |           |            |        |        |        |        |        |        | E(5)   |           |         | Within antigenic site Ca2 (1)     |  |
| HA   | 300(283)              | K(585),E(8),X(1),N(1)       |                      |           |            |        |        |        |        |        |        | E(4)   |           |         |                                   |  |
| HA   | 310(293)              | Q(568),H(22),X(5)           |                      |           |            |        | H(4)   |        |        |        |        |        |           |         |                                   |  |
| HA   | 391(374)              | E(547),K(48)                |                      |           |            |        |        |        | K(5)   |        |        |        | K(3),E(2) |         |                                   |  |
| NP   | 61                    | I(566),M(27),X(2)           |                      |           | M(27)      |        |        |        |        |        |        |        |           |         |                                   |  |
| NP   | 100                   | I(449),V(145),R(1)          | V(25)                | V(3)      | V(27)      |        |        |        |        |        |        |        |           |         |                                   |  |
| NP   | 373                   | T(521),I(71),X(2),S(1)      |                      | I(3)      | I(27)      |        |        |        |        |        |        |        |           |         |                                   |  |
| NA   | 106                   | I(446),V(148),X(1)          | V(25)                | V(3)      | V(26),I(1) |        |        |        |        |        |        |        |           |         |                                   |  |
| NA   | 248                   | D(441),N(153),B(1)          | N(25)                | N(3)      | N(27)      |        |        |        |        |        |        |        |           |         |                                   |  |
| NA   | 340                   | S(565),F(29),X(1)           |                      |           | F(27)      |        |        |        |        |        |        |        |           |         |                                   |  |
| NS1  | 123                   | V(357),I(236),X(2)          | I(25)                | I(3)      | I(27)      | I(3)   | I(4)   |        |        |        |        |        |           |         |                                   |  |
| NS1  | 133                   | N(590),D(5)                 |                      |           |            |        |        |        |        |        |        | D(5)   |           |         |                                   |  |
| NS2  | 64                    | K(593),R(2)                 |                      | R(2),K(1) |            |        |        |        |        |        |        |        |           |         |                                   |  |

2 <sup>a</sup> Coding position in open reading frame. For the HA protein, positions based of H1 numbering scheme are shown in parentheses.

3 <sup>b</sup> Global frequencies (including UK clusters) of amino acids at this position

4 <sup>c</sup> Frequencies of amino acids at this position for each cluster
