# Supplementary material
Source: PubMed Central journal article supplement (PMC3255882)

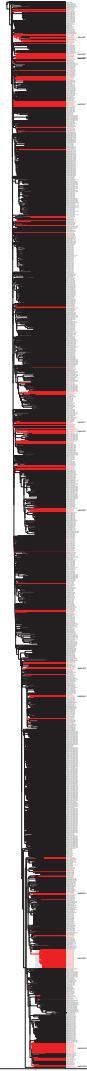

Supplement: supp_86.1.11_FigS2.pdf [file supp_86.1.11_FigS2.pdf]

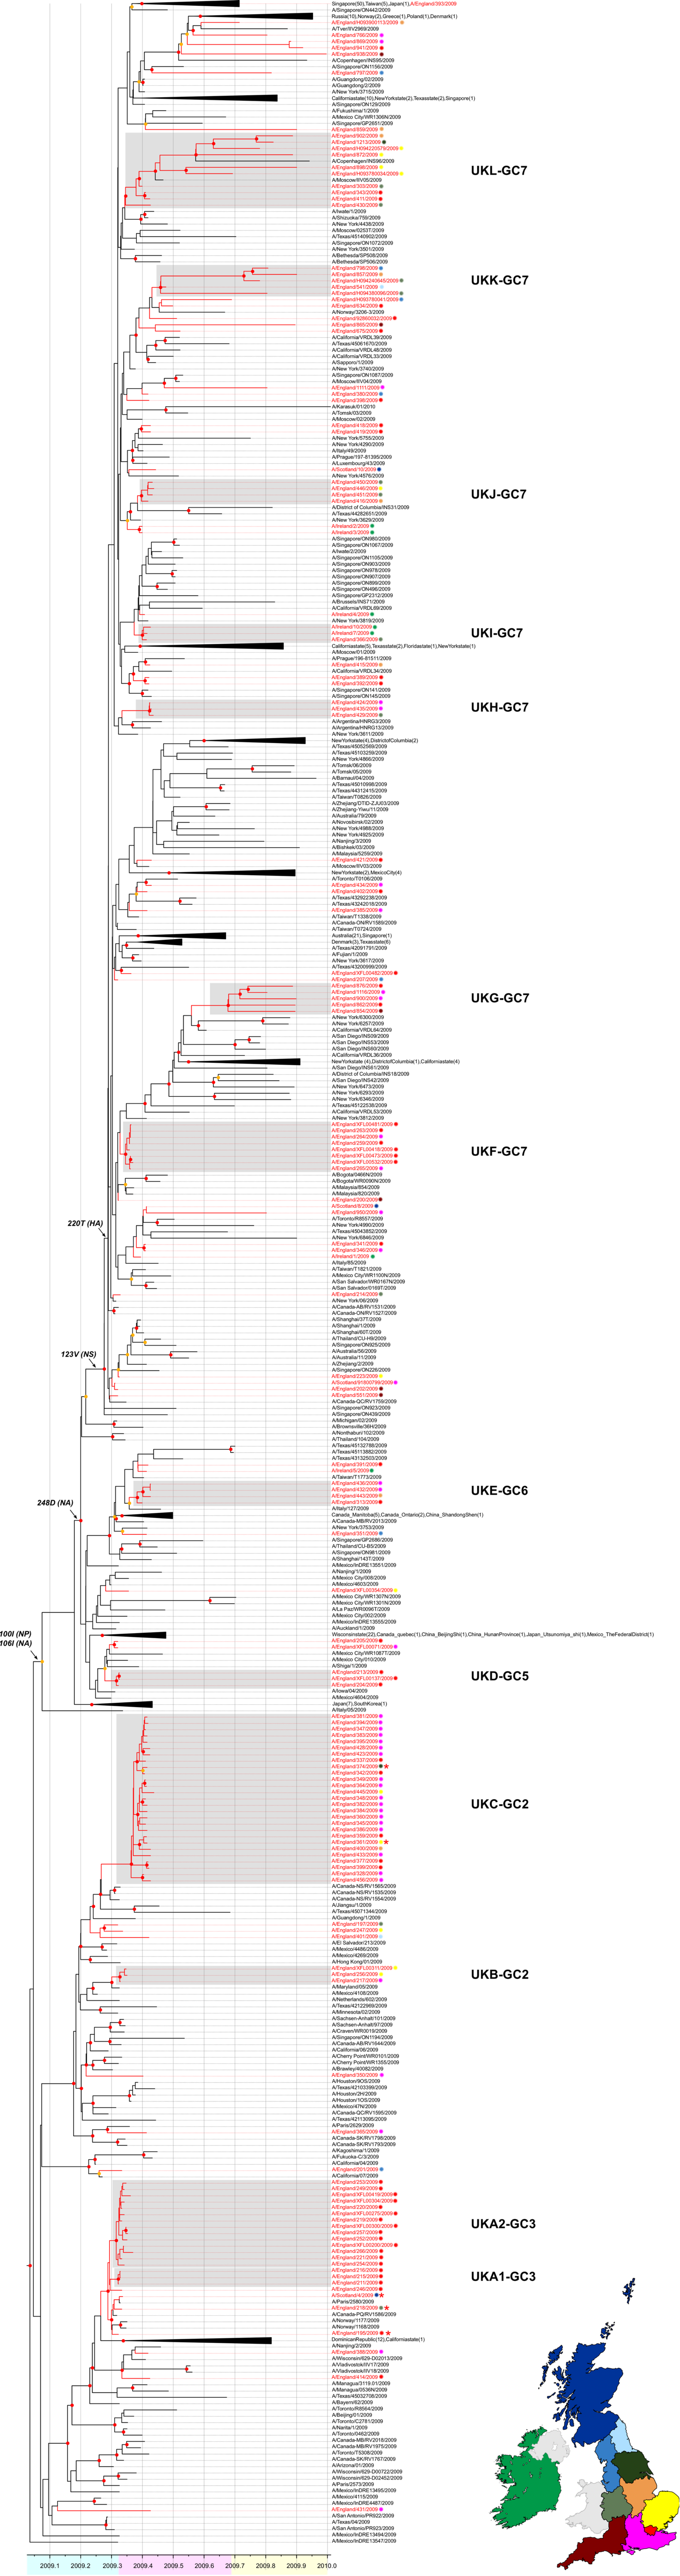

Supplement: supp_86.1.11_FigureS1.pdf [file supp_86.1.11_FigureS1.pdf]

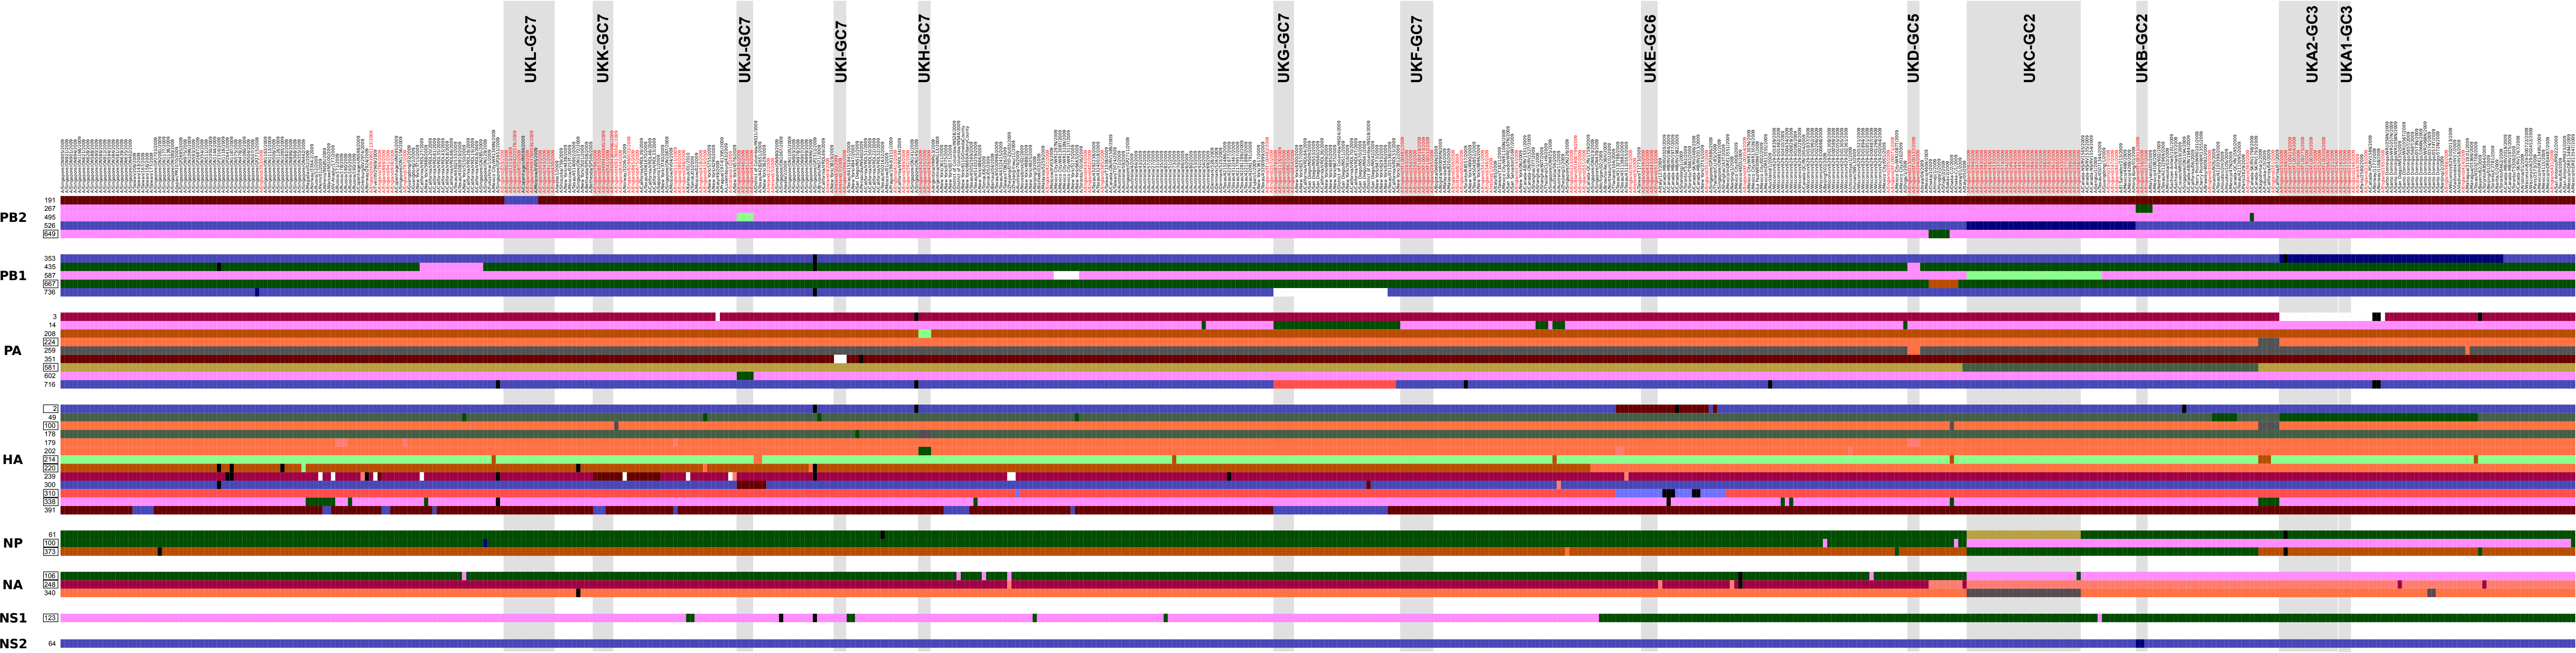

Supplement: supp_86.1.11_FigureS3.pdf [file supp_86.1.11_FigureS3.pdf]
